# Supplementary material for: Serological Investigation for Brucella ceti in Cetaceans from the North-Western Mediterranean Sea
Source: Preprints.org preprint supplement (doi:10.20944/preprints202407.0209.v1), 2024-07-02
Supplement: Supplementary file 1 [file supplementary]

## Sheet: Sheet1
Order	Id	Species	Year	A/D	Sex	Length (cm)	Weight (kg)	Age (years)	Age class	BR Test	BruPCR	Titer cELISA	Attempted Brucella culture	Culture result	ELISA Category	CeMV	Lesions CNS	Other relevant findings	CAUSE OF DEATH	CAUSE OF DEATH (as grouped in the paper)
1	N-083/12	Stenella coeruleoalba	2012	D	F	215	96	15	Ad							N	No	Recent feeding, loss of teeth	Bycatch	Bycatch
2	N-120/12	Stenella coeruleoalba	2012	D	F	195	78.5	15	Ad							N	Focal polioencephalomalacia	No	Encephalomalacia	Encephalomalacia
3	N-121/12	Tursiops truncatus	2012	D	F	290	280		Ad							N	No	Recent feeding, gas embolism	Bycatch	Bycatch
4	N-146/12	Stenella coeruleoalba	2012	D	F	184	78.5	6.25	Ad							N	No	No	Unknown	Unknown
5	N-156/12	Stenella coeruleoalba	2012	D	M	173	80	4.91	J							N	No	Recent feeding, gas embolism	Bycatch	Bycatch
6	N-157/12	Stenella coeruleoalba	2012	D	M	200	89	26	Ad							N	No	Recent feeding	Bycatch	Bycatch
7	N-164/12	Stenella coeruleoalba	2012	D	F	190	-	8.58	Ad							N	No	Not done	Unknown	Unknown
8	N-168/12	Stenella coeruleoalba	2012	D	F	181	62	5.55	J							N	No	Recent feeding	Bycatch	Bycatch
9	N-176/12	Stenella coeruleoalba	2012	D	M	142	36	1.57	J							N	No	Recent feeding, propeller wounds	Bycatch	Bycatch
10	N-225/12	Stenella coeruleoalba	2012	D	M	208	65	26	Ad							N	No	Foreign content in stomach	Unknown	Unknown
11	N-226/12	Stenella coeruleoalba	2012	D	F	202	74	15	Ad							N	No	Recent feeding	Bycatch	Bycatch
12	N-275/12	Tursiops truncatus	2012	D	M	300	-		Ad	Pos	Pos		Yes	Pos		N	Mucormycosis	Spondylitis by Brucella ceti	Mucormycosis	Infectious
13	N-301/12	Stenella coeruleoalba	2012	A	F	184	54.5	6.25	Ad	Pos	Pos	1/160	Yes	Pos	Pos	N	Meningitis	No	Neurobrucellosis	Neurobrucellosis
14	N-330/12	Stenella coeruleoalba	2012	D	F	182	67.5	5.77	J							N	No	No	Unknown	Unknown
15	N-442/12	Tursiops truncatus	2012	D	F	281	200		Ad							N	No	Prenecropsia	Bycatch	Bycatch
16	N-541/12	Grampus griseus	2012	D	F	309	300		Ad	Pos	Pos	1/160	Yes	N	pos	N	Haemorrhages	Recent feeding, lung edema, Crassicauda (mild)	Bycatch	Bycatch
17	N-555/12	Stenella coeruleoalba	2012	D	M	193	83.5	10.39	Ad							N	No	Recent feeding, enteritis by Moraxella, gas embolism	Bycatch	Bycatch
18	N-556/12	Stenella coeruleoalba	2012	D	F	188	78	7.57	Ad	N	Pos	1/80	Yes	N	neg	N	Haemorrhages	Recent feeding, gas embolism	Bycatch	Bycatch
19	N-567/12	Stenella coeruleoalba	2012	D	M	175	67	5.23	J	Pos	N		Yes	N		N	Haemorrhages	Tension pneumothorax	Tension pneumothorax	Other
20	N-019/13	Stenella coeruleoalba	2013	D	M	114	15	0.1	C							N	No	Calf	Mother-calf separation	Mother-calf separation
21	N-255/13	Grampus griseus	2013	A	M	143	35		C	N						N	No	Pneumonia by Aeromonas dhakensis	Septicemia	Infectious
22	N-281/13	Grampus griseus	2013	A	M	316	210		Ad		Pos					N	Meningitis, mild	Crassicauda grampicola	Sinusitis Crassicauda	Sinusitis Crassicauda
23	N-009/14	Stenella coeruleoalba	2014	D	M	183	70	6	Ad	N		>1:5			neg	N	No	Declared bycatch	Bycatch	Bycatch
24	N-197/14	Stenella coeruleoalba	2014	A	M	174	47.5	5.07	J	N	Pos	1/5	Yes	N	neg	N	Meningitis, Actinobacillus delphinicola	No	Meningitis	Infectious
25	N-291/14	Stenella coeruleoalba	2014	D	F	104	13.5	0.1	C							N	No	Calf	Mother-calf separation	Mother-calf separation
26	N-352/14	Stenella coeruleoalba	2014	D	M	130	26.5	0.68	J							N	No	Recent feeding	Bycatch	Bycatch
27	N-355/14	Stenella coeruleoalba	2014	D	F	107	9.5	0.1	C							N	No	Hypoccampus ingestion	Mother-calf separation	Mother-calf separation
28	N-370/14	Stenella coeruleoalba	2014	D	M	204	85.5	26	Ad							N	No	Recent feeding, histology not performed	Bycatch	Bycatch
29	N-029/15	Stenella coeruleoalba	2015	A	M	204	89.5	26	Ad	N		1/10			neg	N	No	Hepatitis by Sarcocystis spp., tension pneumothorax	Hepatic sarcocystosis	Infectious
30	N-049/15	Stenella coeruleoalba	2015	D	F	190	76	8.58	Ad	N	N	>1:5			neg	N	No	Esophageal hyperkeratosis, retroperitoneal abscess Moraxella, lung edema, hydropericardium	Septicemia	Infectious
31	N-068/15	Stenella coeruleoalba	2015	A	F	204	83.5	15	Ad	N		1/10			neg	N	Haemorrhages	Sand in stomach, anisakidasis, protozoal panniculitis	Protozoal panniculitis	Infectious
32	N-286/15	Stenella coeruleoalba	2015	A	F	100	8	0.1	C	N		1/10			neg	N	No	Calf, lung edema	Mother-calf separation	Mother-calf separation
33	N-366/15	Balaenoptera physalus	2015	A	M	660	-		C							N	No	Calf	Mother-calf separation	Mother-calf separation
34	N-407/15	Stenella coeruleoalba	2015	D	M	210	86	26	Ad							N	No	Septicemia by Photobacterium damselae	Septicemia	Infectious
35	N-408/15	Stenella coeruleoalba	2015	A	M	205	99	26	Ad							N	No	No	Unknown	Unknown
36	N-005/16	Stenella coeruleoalba	2016	D	F	190	70	8.58	Ad	N		1/40			neg	N	No	Recent feeding	Bycatch	Bycatch
37	N-022/16	Stenella coeruleoalba	2016	A	M	198	72	15.44	Ad	N	Pos		Yes	N		N	Meningitis, mild	Fibrinous arthritis	Diskospondylitis	Infectious
38	N-075/16	Grampus griseus	2016	A	F	290	235		Ad	N	Pos	1/80	Yes	N	neg	N	Meningitis, mild	Crassicauda grampicola	Sinusitis Crassicauda	Sinusitis Crassicauda
39	N-109/16	Grampus griseus	2016	A	M	310	242		Ad	Pos	N	>1:5	Yes	N	neg	N	No	Crassicauda grampicola	Sinusitis Crassicauda	Sinusitis Crassicauda
40	N-144/16	Grampus griseus	2016	A	M	310	-		Ad		Pos		Yes	N		N	No	Crassicauda grampicola, epididymitis	Sinusitis Crassicauda	Sinusitis Crassicauda
41	N-248/16	Tursiops truncatus	2016	D	M	240**	200		Ad							N	No	Amputation, recent feeding	Bycatch	Bycatch
42	N-260/16	Stenella coeruleoalba	2016	D	F	170	39.5	3.88	J	Pos	Pos	1/160	Yes	Pos	pos	N	Meningitis	Serous atrophy of fat	Neurobrucellosis	Neurobrucellosis
43	N-280/16	Grampus griseus	2016	D	M	290	250		Ad							N	No	Crassicauda grampicola, mild	Unknown	Unknown
44	N-298/16	Grampus griseus	2016	A	M	150	34.5		C							N	Focal polioencephalomalacia	Calf, Photobacterium damselae and Vibrio septicemia	Septicemia	Infectious
45	N-319/16	Stenella coeruleoalba	2016	A	F	180	47	5.35	J	Pos	Pos	1/160	Yes	Pos	pos	Pos	Meningitis	CeMV, systemic; Brucella isolation in CNS	CeMV, Systemic	Neurobrucellosis*
46	N-419/16	Stenella coeruleoalba	2016	D	M	103	14	0.1	C	N						N	No	Hematoma, hepatic fissure	Trauma	Bycatch
47	N-044/17	Stenella coeruleoalba	2017	D	M	153	37	2.53	J	N	Pos	>1:5			neg	Pos	Mycotic encephalitis	No	CeMV, Systemic	CeMV
48	N-045/17	Stenella coeruleoalba	2017	D	F	123	22	0.61	J	N	Pos	>1:5			neg	Pos	Mycotic encephalitis	No	CeMV, Systemic	CeMV
49	N-046/17	Stenella coeruleoalba	2017	D	F	152	37.5	2.26	J	N	N					Pos	No	Septicemia by Photobacterium damselae	CeMV, Systemic	CeMV
50	N-077/17	Stenella coeruleoalba	2017	A	F	181	80	5.55	J	N	N	>1:5			neg	Pos	Mycotic encephalitis	CeMV, systemic	CeMV, Systemic	CeMV
51	N-168/17	Stenella coeruleoalba	2017	A	M	193	79	10.39	Ad	Pos	Pos	1/160	Yes	Pos	pos	N	Meningitis	No	Neurobrucellosis	Neurobrucellosis
52	N-169/17	Delphinus delphis	2017	A	M	179	72		J	N	Pos	1/40	Yes	N	neg	N	No	Foreign content in stomach	Unknown	Unknown
53	N-384/17	Stenella coeruleoalba	2017	A	M	97	8	0.1	C							N	No	Calf	Mother-calf separation	Mother-calf separation
54	N-454/17	Stenella coeruleoalba	2017	A	M	204	75	26	Ad	Pos	Pos	>1:5	Yes	N	neg	Pos	Mycotic encephalitis	CeMV, systemic, serous atrophy of fat, icterus	CeMV, Systemic	CeMV
55	N-466/17	Stenella coeruleoalba	2017	D	M	192	62	9.86	Ad		N					Pos	Encephalitis	CeMV, systemic	CeMV, Systemic	CeMV
56	N-488/17	Stenella coeruleoalba	2017	A	M	198	70	15.44	Ad		Pos	1/5			neg	Pos	Encephalitis, aspergillosis	CeMV, systemic	CeMV, Systemic	CeMV
57	N-497/17	Stenella coeruleoalba	2017	D	F	190	76.5	8.58	Ad	Pos	N	1/10	Yes	N	neg	N	No	Gas embolism, CeMV infection probably in remission phase	Bycatch	Bycatch
58	N-509/17	Stenella coeruleoalba	2017	D	M	183	87	6.82	Ad							N	No	Recent feeding, gas embolism	Bycatch	Bycatch
59	N-523/17	Stenella coeruleoalba	2017	D	M	103	13.5	0.1	C							N	No	Calf, alveolar Edema, septicemia by Photobacterium damselae	Septicemia	Infectious
60	N-557/17	Stenella coeruleoalba	2017	A	F	198	87	15	Ad	Pos	N	1/160	Yes	N	pos	N	Focal polioencephalomalacia	No	Encephalomalacia	Encephalomalacia
61	N-591/17	Stenella coeruleoalba	2017	D	F	100	9.5	0.1	C							N	No	Autolysis	Mother-calf separation	Mother-calf separation
62	N-604/17	Stenella coeruleoalba	2017	D	M	164**	65.5		Ad	Pos	N	>1:5	Yes	N	neg	Pos	Encephalitis	Amputation	CeMV, CNS	CeMV
63	N-620/17	Stenella coeruleoalba	2017	A	M	196	75.5	12.63	Ad	Pos	Pos		Yes	N		N	No	Serous atrophy of fat	Unknown	Unknown
64	N-001/18	Stenella coeruleoalba	2018	A	F	200	68	15	Ad	N	N	1/40	Yes	N	neg	Pos	Encephalitis	Foreign body in stomach	CeMV, CNS	CeMV
65	N-005/18	Stenella coeruleoalba	2018	D	M	102	11	0.1	C	N		>1:5			neg	N	No	No	Mother-calf separation	Mother-calf separation
66	N-021/18	Stenella coeruleoalba	2018	D	M	182	73	6.59	Ad	N		>1:5			neg	N	No	Recent feeding	Bycatch	Bycatch
67	N-042/18	Stenella coeruleoalba	2018	D	M	178	62	5.76	J	N		1/160			pos	N	No	Recent feeding	Bycatch	Bycatch
68	N-065/18	Stenella coeruleoalba	2018	D	F	189	80	8.03	Ad	N		>1:5			neg	N	No	Recent feeding	Bycatch	Bycatch
69	N-077/18	Stenella coeruleoalba	2018	D	M	220	97.5	26	Ad	Pos		1/20	Yes	N	neg	N	Meningoencephalitis	Recent feeding, lung edema	Meningoencephalitis (unknown cause)	Other
70	N-145/18	Stenella coeruleoalba	2018	D	F	195	91	15	Ad			1/160			pos	N	No	Recent feeding	Bycatch	Bycatch
71	N-161/18	Stenella coeruleoalba	2018	D	F	121	20.5	0.52	C	N						N	No	Serous atrophy of fat	Mother-calf separation	Mother-calf separation
72	N-232/18	Stenella coeruleoalba	2018	A	F	180	51.5	5.35	J	N		1/160			pos	Pos	Encephalitis	Lung edema	CeMV, CNS	CeMV
73	N-274/18	Stenella coeruleoalba	2018	A	M	152	38	2.43	J	Pos	Pos	1/20	Yes	Pos	neg	N	Meningitis	Lung edema	Neurobrucellosis	Neurobrucellosis
74	N-292/18	Stenella coeruleoalba	2018	D	F	194	59.5	14.98	Ad	N		1/160			pos	N	Encephalitis	Serous atrophy of fat, sand in stomach	CeMV, CNS (probable)	Other
75	N-293/18	Stenella coeruleoalba	2018	A	F	187	85	7.17	Ad	N		1/160			pos	Pos	Meningoencephalitis	No	CeMV, CNS	CeMV
76	N-329/18	Stenella coeruleoalba	2018	A	M	202	82.5	26	Ad	N	N	1/160			pos	N	Focal polioencephalomalacia	Fibrinous bronchiolitis	Polioencephalomalacia	Encephalomalacia
77	N-362/18	Stenella coeruleoalba	2018	A	M	181	78	6.36	Ad		N	1/160			pos	Pos	Encephalitis	No	CeMV, CNS	CeMV
78	N-375/18	Stenella coeruleoalba	2018	D	M	200	90	26	Ad		N	1/160			pos	N	No	Recent feeding, gas embolism	Bycatch	Bycatch
79	N-392/18	Stenella coeruleoalba	2018	A	M	202	79.5		Ad		N					N	No	Ulcerative dermatitis, lung edema	Septicemia	Infectious
80	N-461/18	Stenella coeruleoalba	2018	A	M	160	35	3.24	J	N						N	No	No	Unknown	Unknown
81	N-511/18	Stenella coeruleoalba	2018	A	F	186	64	6.83	Ad		N					N	No	Protozoal dermatitis and panniculitis	Unknown	Unknown
82	N-521/18	Tursiops truncatus	2018	A	F	187	58.5		J							N	No	Protozoal dermatitis and panniculitis, lung edema, foreign body ingestion	Unknown	Unknown
83	N-177/19	Ziphius cavirostris	2019	D	M	520	1200		Ad							N	No	Rib fractures, hydrothorax, lung atelectasis	Trauma	Bycatch
84	N-258/19	Stenella coeruleoalba	2019	D	F	200	86.5	15	Ad			1/20			neg	N	No	Pyloric stomach perforation by trematodes, fibrinous peritonitis, pregnancy	Peritonitis	Infectious
85	N-258/19*	Stenella coeruleoalba	2019	D	M	68	6.8		Fe							N	No	No	Abortion	Other
86	N-312/19	Grampus griseus	2019	A	F	173	47.5		C		N	1/160			pos	N	No	No	Mother-calf separation	Mother-calf separation
87	N-314/19	Stenella coeruleoalba	2019	A	F	159	41	2.8	J	Pos	Pos	1/160	Yes	Pos	pos	N	Meningitis	No	Neurobrucellosis	Neurobrucellosis
88	N-361/19	Stenella coeruleoalba	2019	A	M	175	56.5	4.52	J	Pos	Pos	1/160			pos	Pos	Encephalitis	No	CeMV, CNS	CeMV
89	N-368/19	Stenella coeruleoalba	2019	A	M	175	47	5.23	J	Pos	Pos	1/160	Yes	Contaminated	pos	N	Meningitis	Serous atrophy of fat	Neurobrucellosis	Neurobrucellosis
90	N-414/19	Stenella coeruleoalba	2019	D	F	213	93	15	Ad		N	1/10			neg	N	No	Mandibular fracture, gas embolism	Bycatch	Bycatch
91	N-064/20	Stenella coeruleoalba	2020	A	F	190	80	8.58	Ad		N	1/80			neg	N	Meningoencephalitis	Foreign body in stomach	Meningoencephalitis of unknown origin	Other
92	N-090/20	Tursiops truncatus	2020	D	M	200	103		J		N					N	No	Recent feeding, gas embolism	Bycatch	Bycatch
93	N-118/20	Stenella coeruleoalba	2020	D	M	124	19	0.28	J		N					N	No	No	Pancreatic necrosis, trematodes	Infectious
94	N-129/20	Stenella coeruleoalba	2020	A	M	175	52	5.23	J		N	1/80			neg	N	Meningoencephalitis	Sand in stomach	Meningoencephalitis of unknown origin	Other
95	N-179/20	Tursiops truncatus	2020	D	F	240	142		Ad		N					N	No	Recent feeding, gas embolism	Bycatch	Bycatch
96	N-218/20	Stenella coeruleoalba	2020	A	F	198	65.5	15	Ad		N	1/5			neg	N	Focal polioencephalomalacia	Laryngeal appendix displacement	Polioencephalomalacia	Encephalomalacia
97	N-242/20	Stenella coeruleoalba	2020	A	F	195	63	15	Ad		N	1/40			neg	N	No	Serous atrophy of fat	Unknown	Unknown
98	N-278/20	Stenella coeruleoalba	2020	D	M	193	81.5	10	Ad		N	1/80			neg	N	No	Gas embolism	Bycatch	Bycatch
99	N-307/20	Stenella coeruleoalba	2020	D	F	115	15.5	0.1	C		N	>1:5			neg	N	No	No	Unknown	Unknown
100	N-328/20	Stenella coeruleoalba	2020	D	M	180	66.5	6.15	Ad							N	No	Recent feeding, gas embolism	Bycatch	Bycatch
101	N-023/21	Globicephala melas	2021	D	F	300	218		J		Pos	>1:5			neg	Pos	Encephalitis	No	CeMV, CNS	CeMV
102	N-028/21	Stenella coeruleoalba	2021	D	M	206	85	26	Ad		N	1/160			pos	N	No	Serous atrophy of fat, necrotizing pneumonia, mandibular fracture	Tension pneumothorax	Other
103	N-034/21	Grampus griseus	2021	D	F	320	202		Ad		Pos	>1:5			neg	N	No	Serous atrophy of fat, Stenurus globicephala in pterygoidal sinuses, sand ingestion	Sinusitis caused by Crassicauda grampicola	Sinusitis Crassicauda
104	N-065/21	Tursiops truncatus	2021	D	F	185	79		J		Pos					N	No	Gas embolism	Bycatch	Bycatch
105	N-076/21	Stenella coeruleoalba	2021	D	M	197	65	13.79	Ad		N					N	No	Serous atrophy of fat	Unknown	Unknown
106	N-077/21	Stenella coeruleoalba	2021	D	M	111	15.5	0.1	C		N					N	No	Serous atrophy of fat	Mother-calf separation	Mother-calf separation
107	N-092/21	Stenella coeruleoalba	2021	D	F	192	68	10.2	Ad		N	1/40			neg	N	Encephalitis, mild	Serous atrophy of fat, lung edema	Unknown	Unknown
108	N-095/21	Stenella coeruleoalba	2021	D	F	186	71.5	6.83	Ad		N	1/10			neg	N	No	Gas embolism, recent feeding, hydrothorax, hydropericardium	Bycatch	Bycatch
109	N-101/21	Stenella coeruleoalba	2021	D	M	96	12	0.1	C		N					N	No	No	Mother-calf separation	Mother-calf separation
110	N-102/21	Stenella coeruleoalba	2021	D	M	204	77	26	Ad		N	>1:5			neg	N	No	Serous atrophy of fat	Tension pneumothorax	Other
111	N-115/21	Stenella coeruleoalba	2021	D	M	204	98.5	26	Ad		N	>1:5			neg	N	No	Recent feeding, teeth loss	Bycatch	Bycatch
112	N-124/21	Stenella coeruleoalba	2021	D	F	201	99	15	Ad			1/5			neg	N	No	Gas embolism, recent feeding	Bycatch	Bycatch
113	N-126/21	Delphinus delphis	2021	D	M	211	96		Ad		N					N	Brain edema	Lung edema, teeth loss	Unknown	Unknown
114	N-128/21	Stenella coeruleoalba	2021	D	M	208	93	26	Ad		N	1/20			neg	N	No	Serous atrophy of fat	Muscular Degeneration	Other
115	N-163/21	Tursiops truncatus	2021	D	M	171	74.5		J		Pos					N	No	Recent feeding, gas embolism	Bycatch	Bycatch
116	N-195/21	Stenella coeruleoalba	2021	D	F	189	75	8.03	Ad		N					N	No	Intestinal obstruction and perforation	Peritonitis	Infectious
117	N-211/21	Stenella coeruleoalba	2021	A	M	200	72.5	26	Ad		N	1/10			neg	N	Focal polioencephalomalacia	No	Polioencephalomalacia	Encephalomalacia
118	N-334/21	Stenella coeruleoalba	2021	A	M	200	87	26	Ad		N	1/80			neg	Pos	Encephalitis	No	CeMV, CNS	CeMV
119	N-465/21	Stenella coeruleoalba	2021	D	F	184	80	6	Ad		N	1/160			pos	N	No	Recent feeding, gas embolism	Bycatch	Bycatch
120	N-138/22	Stenella coeruleoalba	2022	D	F	204	83.5	15	Ad			1/20			neg	N	No	Intestinal obstruction and perforation	Peritonitis	Infectious
121	N-268/22	Tursiops truncatus	2022	A	F	132	27.5		C		N	>1:5			neg	N	No	No	Mother-calf separation	Mother-calf separation
122	N-333/22	Stenella coeruleoalba	2022	A	M	180	47.5	6.15	Ad	N		1/160	Yes	Pos	pos	N	Meningitis	No	Neurobrucellosis	Neurobrucellosis
123	N-385/22	Tursiops truncatus	2022	A	M	313	294		Ad			1/10			neg	N	Suppurative meningitis and vasculitis	Foreign body in stomach, skin infarcts	Erysipelas	Erysipelas
124	N-028/23	Stenella coeruleoalba	2023	A	F	190	67	8.58	Ad	Pos						N	No	Foreign content in stomach	Unknown	Unknown
125	N-051/23	Stenella coeruleoalba	2023	D	F	149	30	2.06	J							N	No	Serous atrophy of fat	Unknown	Unknown
126	N-059/23	Tursiops truncatus	2023	D	M	233	154		J							N	No	Gas embolism	Bycatch	Bycatch
127	N-062/23	Stenella coeruleoalba	2023	A	F	200	77	15	Ad							N	No	Serous atrophy of fat	Pulmonary angiomatosis	Other
128	N-131/23	Tursiops truncatus	2023	D	F	194	90		J							N	No	Recent feeding, gas embolism	Bycatch	Bycatch
129	N-214/23	Stenella coeruleoalba	2023	D	M	159	33.5	3.13	J							N	Meningitis	Necrotizing lymphadenitis, splenitis, hepatitis, periorchitis	Septicemia	Infectious
130	N-215/23	Stenella coeruleoalba	2023	A	M	197	59	13.79	Ad				Yes	Pos		N	Meningitis	Hydrocephalus	Neurobrucellosis	Neurobrucellosis
131	N-319/23	Stenella coeruleoalba	2023	A	F	101	13	0.1	C							NA	No	No	Mother-calf separation	Mother-calf separation
